# Supplementary material for: Photo-regeneration of severed gel with iniferter-mediated photo-growth
Source: Royal Society of Chemistry journal article supplement (doi:10.1039/c6sm02625g), 2017-01-01
Supplement: c6sm02625g1.pdf [file c6sm02625g1.pdf]

## Photo-regeneration of Severed Gel with Iniferter-mediated Photo-Growth

Awaneesh Singh<sup>1</sup>, Olga Kuksenok<sup>2</sup>, Jeremiah Johnson<sup>3</sup> and Anna C. Balazs<sup>1</sup>

<sup>1</sup>Chemical Engineering Department, University of Pittsburgh, Pittsburgh, Pennsylvania 15261, USA.

<sup>2</sup>Department of Materials Science and Engineering, Clemson University, Clemson, SC 29634, USA

<sup>3</sup>Department of Chemistry, Massachusetts Institute of Technology, 77 Massachusetts Avenue, Cambridge, Massachusetts 02139, USA.

### Supplementary Information

#### Comparison of cross-linker density

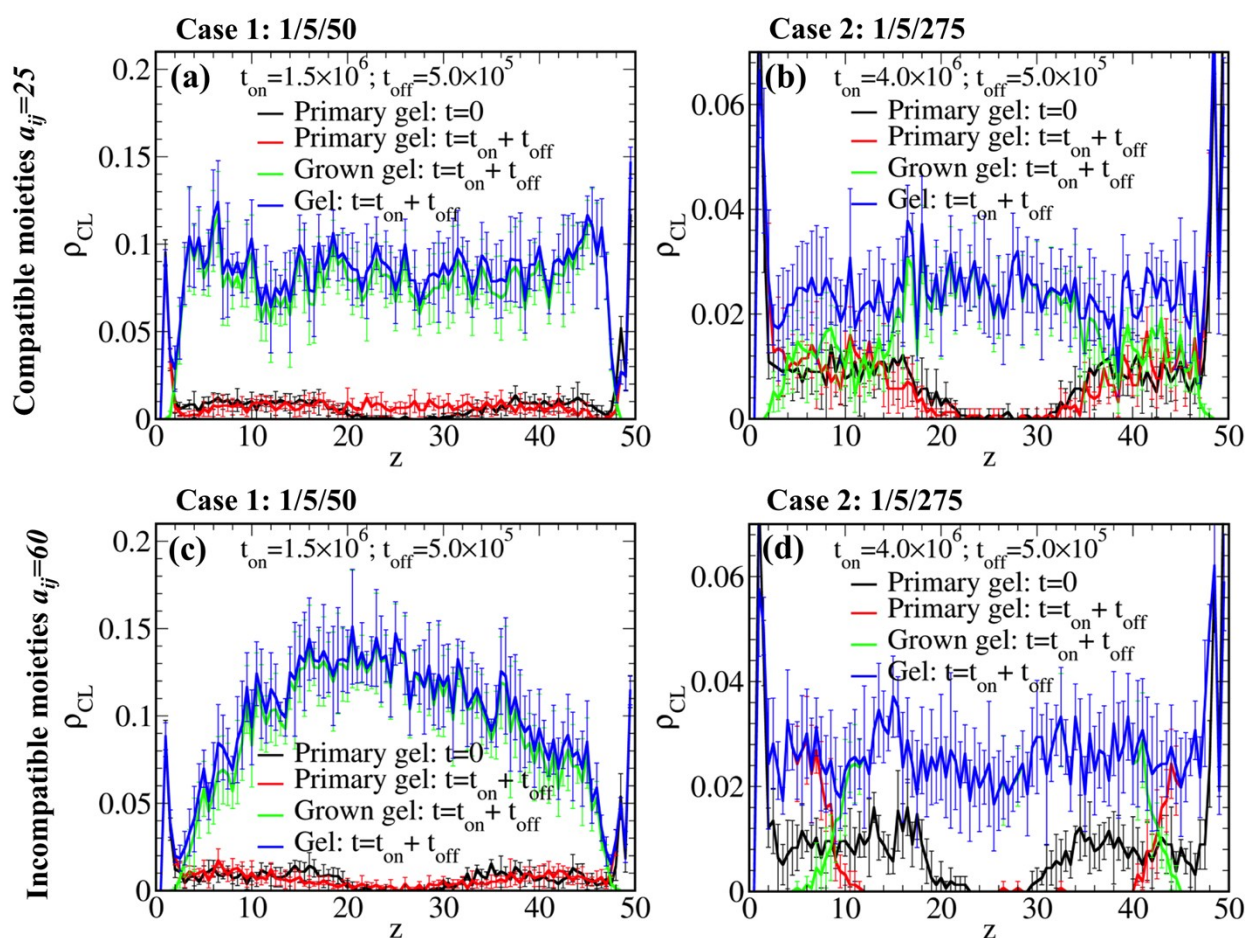

**Figure S1:** Comparison of the number density profiles of cross-linkers for the different cases. Profile for the gel in Fig. 4a is displayed in (a); profile for the gel in Fig. 4e is displayed in (b); profile for the gel in Fig. 6a is displayed in (c); and profile for the gel in Fig. 6c is displayed in (d). Corresponding time steps are shown in the legends. The cross-linker density follows the same trend as the gel density.
